# Supplementary material for: Genomic variation within alpha satellite DNA influences centromere location on human chromosomes with metastable epialleles
Source: PubMed Central journal article supplement — Genome Res. 2016 Oct;26(10):1301–11. doi: 10.1101/gr.206706.116 (PMC5052062; doi:10.1101/gr.206706.116), 2016-10
Supplement: supp_gr.206706.116_Supplemental_Fig_S3.pdf [file supp_gr.206706.116_Supplemental_Fig_S3.pdf]

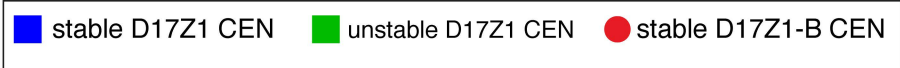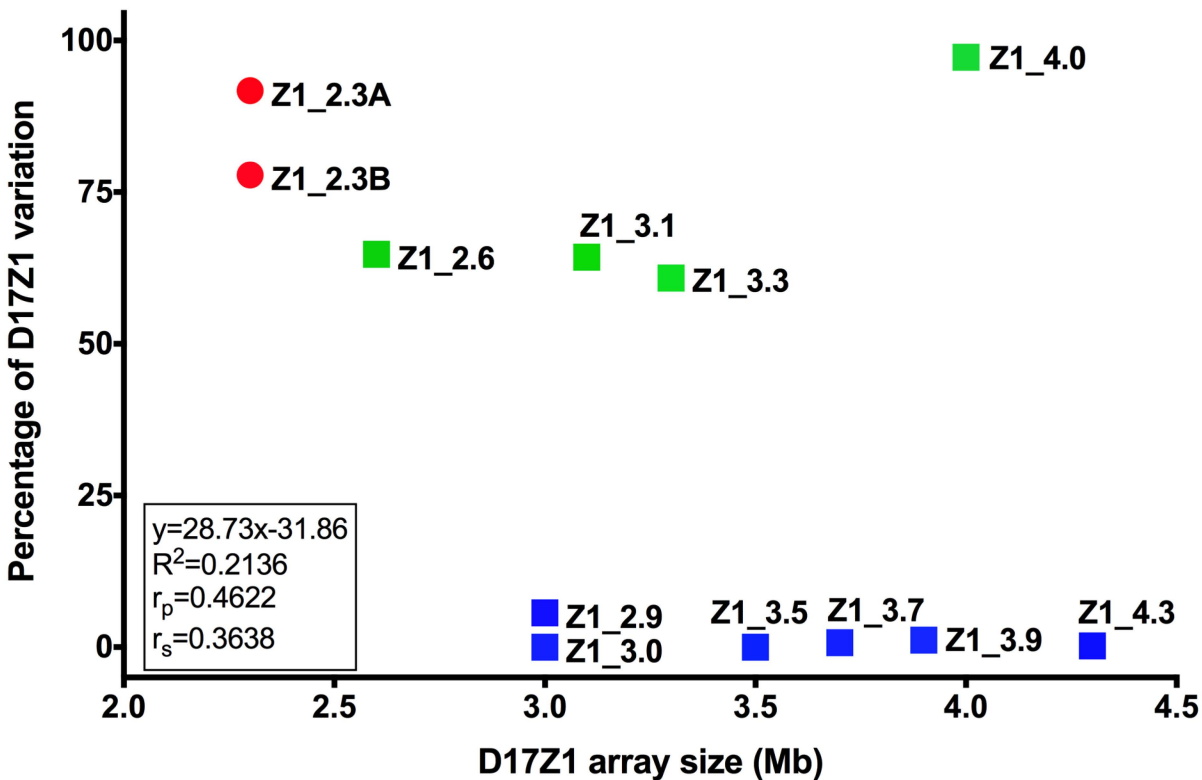

### **Supplemental Figure S3. Relationship between D17Z1 array size and variation**

A. Scatterplot of D17Z1 size versus variation in our HSA17 dataset. There is a weak correlation between small D17Z1 array size and increased variation (proportion of variant HORs) within the array. Blue triangles denote HSA17s with a stable D17Z1 centromere (i.e. D17Z1 is the site of centromere assembly); green squares denote HSA17s with an unstable D17Z1 centromere, and red circles represent HSA17s with high D17Z1 variation, an inactive D17Z1 array, and a stable D17Z1-B centromere. The data appear to be skewed by the extremely large and variant D17Z1 array in Z1\_4.0 that is mitotically unstable (Figure 4). If this array is excluded from the analysis due to its unusual behavior, the correlation between large D17Z1 size and homogeneity (less variation) increases ( $R^2=0.57$ ; Pearson correlation = 0.7557, Spearman correlation 0.69337).
